***Pseudomonas aeruginosa* PA14 biofilms produce R-bodies, extendable protein polymers with roles in host colonization and virulence**

Bryan Wang<sup>1</sup>, Yu-Cheng Lin<sup>1</sup>, Jeanyoung Jo<sup>1</sup>, Alexa Price-Whelan<sup>1</sup>, Shujuan Tao McDonald<sup>1,2</sup>,

5 Lewis M. Brown<sup>1,2</sup>, and Lars E.P. Dietrich<sup>1\*</sup>

<sup>1</sup>Department of Biological Sciences, Columbia University, New York, NY, USA

<sup>2</sup>Quantitative Proteomics and Metabolomics Center, Columbia University, New York, NY, USA

10 \*email: [LDietrich@columbia.edu](mailto:LDietrich@columbia.edu)

***reb* genes code for R-bodies: large, extendable polymers that are known for their roles in obligate endosymbioses. In the non-endosymbiotic pathogen *Pseudomonas aeruginosa*, *reb* homologues are part of a cluster found in virulent strains. Here, we demonstrate that R-bodies are produced in abundance by *P. aeruginosa* PA14 subpopulations during biofilm growth, identify regulators of *reb* gene expression, and show that *reb* genes are required for full colonization and virulence in host models.**

R-bodies are enigmatic biological machines that have been characterized most extensively in *Caedibacter taeniospiralis*, an obligate endosymbiont of paramecia. These structures are composed of ~ 12 kDa monomers that polymerize to form hypercoiled ribbons ~ 0.5  $\mu\text{m}$  in diameter <sup>1</sup>. In response to changes in parameters such as pH, temperature or ionic strength <sup>2-4</sup>, R-body coils extend into 10-20- $\mu\text{m}$ -long needle-like structures (i.e., ~ 10X the length of the producing cell), lysing the bacterium <sup>4,5</sup>. In the *Caedibacter-Paramecium* endosymbiosis, R-body-mediated lysis is thought to release an unidentified factor that is toxic to other paramecia. R-body-producing endosymbionts therefore confer onto their host cell a “killing” phenotype and a competitive advantage against naive peer cells, a phenomenon that was first described by Tracy M. Sonneborn in 1938 <sup>6</sup>.

Diverse proteobacterial genomes contain homologues to genes for R-bodies (i.e., *reb* genes) <sup>7</sup>. In the opportunistic pathogen *P. aeruginosa*, *reb* gene homologues are part of a cluster that is conserved in a substantial fraction (147/241) of complete strain genomes, including those of the virulent strains PA14 and LESB58, but that is not present in the popular and notably less-virulent model strain PAO1 <sup>8,9</sup> (Supplementary File 1). We will refer to genes in the *P. aeruginosa* PA14 *reb* cluster using names shown in **Figure 1a**, which are based on a prior study <sup>10</sup> and phylogenetic analyses conducted using the *C. taeniospiralis* structural genes for R-body production (**Supplementary Figure 1**). Included in this conserved locus are two regulatory

genes, *rebZ* and *fecI2*, which code for a transcription factor and sigma factor, respectively, and  
40 which in a prior study were required for full virulence in a *C. elegans* killing assay <sup>9</sup> (**Figure 1a**).  
Via bioinformatic analyses, we found that though *reb* structural gene homologues are scattered  
across the phylogenetic tree of the genus *Pseudomonas* (**Supplementary Figure 2**),  
homologues of the regulatory genes show strong conservation in strains that contain *reb*  
structural genes, both within the species *P. aeruginosa* (in 146/147 *reb* homologue-containing  
45 genomes; **Supplementary Table 1**) and among other pseudomonads (**Figure 1a**,  
**Supplementary Figure 2**). Though all of these observations hinted at a potential role for R-  
bodies in *P. aeruginosa*-host associations, R-body production by *P. aeruginosa* biofilms and  
during host colonization had not been investigated.

50 To examine whether PA14 produces R-bodies, we applied a modified R-body enrichment  
protocol <sup>11</sup> to biofilms formed by the WT and by  $\Delta pel$ , a mutant that is unable to produce the  
major PA14 exopolysaccharide and yields biofilms that are more amenable to disruption. We  
performed protein mass spectrometry (MS) and scanning-electron microscopy (SEM) on the  
isolated SDS-insoluble fractions (**Figure 1b**). Products of the *reb* cluster were detected by MS.  
55 Three products—PA14\_27680, RebP1, and RebP2-- were detected at similar levels and were  
among the 12 most abundant proteins in our sample (**Figure 1c**). RebP1 and RebP2 have 40-  
42% and 34-40% homology, respectively, to RebB and RebA from *C. taeniospiralis*, which  
constitute the main structural components of R-bodies in that organism <sup>12</sup>. PA14\_27680 is  
conserved in all pseudomonads that contain at least one *reb* structural gene, suggesting that it  
60 may encode another R-body structural component. One other uncharacterized protein coded for  
by the *reb* gene cluster, PA14\_27675, was also detected in the SDS-insoluble fractions  
(**Supplementary File 2 and Figure 1c**). Consistent with the MS results, our SEM analyses  
revealed the presence of R-bodies in preparations from WT PA14 biofilms (**Figure 1d**). We  
detected R-bodies in various states of extension ranging from hypercoiled (~ 450 nm long) to

65 fully extended (~ 5.5  $\mu\text{m}$  long) (**Figure 1d, e**). These structures were not observed in a deletion mutant lacking the *rebP1P2* operon ( $\Delta\text{rebP1P2}$ ) (**Supplementary Figure 3**). Taken together, these data indicate that R-bodies are produced by PA14 biofilms.

Based on the conservation of *rebZ* and *fecI2* in strains containing R-body structural gene  
70 homologues (**Figure 1a; Supplementary File 1; Supplementary Figure 1**), we reasoned that one or both of these genes control expression of *rebP1P2*. To test this, we generated constructs that report expression from the *rebP1P2* promoter ( $P_{\text{rebP1}}$ ) as red (mScarlet) or green (GFP) fluorescence and inserted these into a neutral site on the chromosome in WT PA14 and regulatory gene mutants. We observed  $P_{\text{rebP1}}$  activity in WT colony biofilms that was dependent  
75 on the presence of both *rebZ* and *fecI2* (**Figure 1f-h** and **Supplementary Figure 3**). Because biofilm development leads to the formation of steep chemical gradients that can affect gene expression patterns along the z-axis<sup>13</sup>, we wanted to visualize  $P_{\text{rebP1}}$  activity across depth. We employed a thin sectioning protocol to prepare vertical sections taken from the center region of three-day-old colony biofilms<sup>14</sup>. Confocal microscopy of  $P_{\text{rebP1}}\text{-mScarlet}$  biofilm sections  
80 revealed that, strikingly, cells expressing *rebP1P2* are present in thin striations such that both bright and dark cells are situated at the same depth. For comparison, we prepared sections of biofilms in which *gfp* expression was driven by a constitutive promoter ( $P_{\text{PA1/04/03-gfp}}$ ) and observed fluorescence that is more consistent between cells at the same depth (**Supplementary Figure 3**). Our results suggest that  $P_{\text{rebP1}}$ -driven expression is stochastic and  
85 that expression status is heritable during vertical growth in the the biofilm.

The fact that homologues of the *C. taeniospiralis* R-body structural genes are found in diverse free-living bacteria suggests that their roles extend beyond endosymbiotic interactions<sup>7</sup> (**Supplementary Figure 1**). *P. aeruginosa* forms biofilms and acts as an extracellular pathogen  
90 during colonization of a range of hosts including plant and nematode models<sup>15,16</sup>. To examine

whether *rebP1P2* is expressed during interactions with hosts, we employed the  $P_{rebP1}$ -*mScarlet* reporter strain in *Arabidopsis thaliana* seedling and *Caenorhabditis elegans* gut colonization assays. In both hosts, as in biofilms, *rebP1P2* expression patterns were distinct from those exhibited by a promoter driving constitutive expression of mScarlet ( $P_{PA1/04/03}$ -*mScarlet*). While  
95 constitutive mScarlet production was uniform and fuzzy across colonized regions of hosts (**Figure 2a, b**), *rebP1P2* expression was punctate and restricted to a subset of PA14 cells (**Figure 2a, b**). To rule out the possibility that constitutive mScarlet production represented non-specific, background fluorescence, we expressed mScarlet without a promoter (*MCS-mScarlet*) in these hosts. Indeed, promoterless mScarlet expression was not observed in either *A. thaliana*  
100 or *C. elegans* (**Figure 2a, b**). The distinct *rebP1P2* expression patterns we observed in the colony biofilm and host contexts may indicate that there is an advantage to restricting R-body production to a subset of cells in the population.

In *C. taeniospiralis* and *Azorhizobium caulinodans*, R-body production has been linked to host-  
105 associated phenotypes that confer toxicity<sup>4,17,18</sup>. We hypothesized that R-bodies contribute to PA14 host colonization and/or pathogenicity and therefore performed established assays to test such contributions of PA14 R-body production in our two host systems. In *A. thaliana*, we quantified the extent to which PA14 WT and mutant strains colonized seedlings after inoculation and five days of plant growth. For the *C. elegans* virulence assay, we quantified percent survival  
110 for up to four days after synchronized populations of worms were exposed to PA14 WT and mutant strains. When compared to WT PA14,  $\Delta rebP1P2$  displayed attenuated host colonization (**Figure 2e**) and virulence (**Figure 2f**); both phenotypes were restored to WT levels upon complementation of *rebP1P2*.

115 In many hosts and various infection sites in humans, biofilm formation is critical to bacterial colonization and virulence and requires production of matrix<sup>19</sup>. Matrix secretion is a defining

feature of biofilms; the matrix functions as the “glue” that holds bacterial cells together and can facilitate attachment to the host <sup>20</sup>. To test whether matrix production is affected by a defect in R-body production, we examined biofilm development using a standardized colony morphology  
120 assay, in which the dye Congo red is provided in the medium and binds to biofilm matrix. We found that matrix production and biofilm development were unaltered in the  $\Delta rebP1P2$  mutant (**Figure 2c**). Furthermore,  $\Delta rebP1P2$  showed no fitness disadvantage when grown in mixed-strain colony biofilms with the WT parent (**Figure 2d**). We conclude the *A. thaliana* colonization and *C. elegans* killing defects observed in the  $\Delta rebP1P2$  mutant are not mediated via effects on  
125 biofilm formation and that the benefit of R-body production is specific to the host-associated lifestyle.

We have shown here the production of R-bodies by PA14 cells growing in biofilms and demonstrated a role for these structures during host infection. Expression of the PA14 R-body  
130 structural genes is stochastic and can be observed both in independent biofilms and during association with hosts. However, an advantage to R-body production is detectable only during host colonization, suggesting that R-body function is specific to infection. *Caedibacter* R-body extension is triggered by low pH and occurs in phagosomes of naive paramecia, prompting *Caedibacter* lysis and the release of other toxins within *Caedibacter* cells and thereby killing the  
135 eukaryotic predator <sup>4,5</sup>. We speculate that PA14 R-body extension is similarly triggered in a host-specific manner and that cells in the R-body-producing subpopulation act as “kamikazes” to release other bacterial products that facilitate colonization and enhance virulence. Our findings identify R-bodies as novel *P. aeruginosa* virulence factors and raise the possibility that R-body production contributes to the behaviors of diverse free-living bacteria during interactions  
140 with other organisms.

## METHODS

**Bacterial strains and growth conditions.** Strains used in this study are listed in

145 Supplementary Table 1. Liquid cultures of *Pseudomonas aeruginosa* strain UCBPP-PA14 (PA14) were grown in lysogeny broth (LB) at 37°C with shaking at 250 rpm. Biological replicates were inoculated from distinct clonal-source colonies grown on LB + 1.5% agar plates. Overnight precultures were grown for 14-16 h and subcultures were prepared by diluting precultures 1:100 in LB and growing until mid-exponential phase (OD at 500 nm ~ 0.5).

150

**Construction of PA14 mutant strains.** Markerless deletion, complementation, and constitutive-expression strains were made as described previously<sup>21</sup>. Briefly, flanking sequences containing the target locus were amplified using the primers listed in Supplementary Table 2 and inserted into pMQ30 through gap repair cloning in *Saccharomyces cerevisiae*

155 InvSc1<sup>22</sup>. Each plasmid, listed in Supplementary Table 3, was moved into PA14 and resolved out using selective media. PA14 double recombinants (markerless strains) were confirmed by PCR.

**Construction of PA14 reporter strains.** The desired promoter region (500 bp upstream of the

160 *rebP1P2* operon for  $P_{rebP1P2}$ -*mScarlet*; the synthetic *lac* promoter for  $P_{PA1/03/04}$ -*mScarlet*) was amplified using the primers listed in Supplementary Table 1 and ligated into pLD3208, upstream of *mScarlet*. Resulting plasmids were integrated into a neutral site in the PA14 genome using biparental conjugation and the plasmid backbone was resolved out via FLP-FRT recombination. Reporter constructs containing *mScarlet* were isolated using selective media and confirmed by

165 PCR.

**Colony biofilm morphology assays.** Ten  $\mu$ L of liquid subcultures were spotted on 60 mL of colony morphology medium (1% tryptone, 1% agar, 40  $\mu$ g/mL Congo red dye, 20  $\mu$ g/mL

Coomassie blue dye) and incubated for up to five days in the dark at 25°C with >90% humidity  
170 (Percival CU-22L) and imaged daily with an Expression 11000XL scanner (Epson). Images  
shown are representative of at least six biological replicates.

**Competition assays.** Fluorescent, mScarlet-expressing and non-fluorescent cells were mixed  
together in a 1:1 ratio from subcultures and grown as mixed-strain biofilms as described above.  
175 After three days, biofilms were resuspended in 1 mL of 1% tryptone and homogenized in a bead  
mill homogenizer (Omni Bead Ruptor 12) for 99 s on the “high” setting. Serial dilutions of  
homogenized cells were plated onto 1% tryptone + 1.5% agar plates for colony forming unit  
(CFU) determination. Fluorescent CFUs were determined by imaging with a Typhoon FLA7000  
fluorescent scanner (GE Healthcare).

180

**Purification of SDS-insoluble biofilm fraction.** Twenty, five-day-old PA14  $\Delta peIB-G$  colony  
biofilms were resuspended in 80 mL of sterile phosphate-buffered saline (PBS) and sonicated  
for 2 x 10 s on ice with the microtip of a Sonifier 250 (Branson). SDS and  $\beta$ -mercaptoethanol  
were added to final concentrations of 2% and 5%, respectively. After nutating on a Nutating  
185 Mixer (Fisher Scientific) at room temperature (RT; ~ 25°C) for 60 min, the sample was aliquoted  
into 1.5-mL microfuge tubes and the insoluble fraction was spun down at 16,873 x g for 5 min.  
The supernatant was discarded and pellets were pooled together.

**Mass spectrometry of SDS-insoluble proteins.** The SDS-insoluble pellet was washed three  
190 times with Optima water (Fisher Scientific), solubilized in 100  $\mu$ L of 98% formic acid at room  
temperature for 1 h. spin-vacuum dried for 1.5 h, washed with 50% methanol and water, and  
then dissolved in 2% RapiGest (Waters Corp.) with 6 mM DTT. Samples were then sonicated,  
boiled, cooled, cysteines reduced and alkylated and proteins digested with trypsin as described  
previously<sup>23</sup>. Liquid Chromatography mass/ spectrometry (120 min runs) was performed with



195 the Synapt G2 (Waters Corp.) in positive resolution/ion mobility mode with proteins identified  
with ProteinLynx Global Server (PLGS) as described previously <sup>24</sup>. Proteins were also identified  
and semi-quantitatively measured with a Q Exactive HF (Orbitrap, Thermo Scientific) with  
Mascot V. 2.5 as described previously <sup>25</sup>. Identification of the most abundant proteins in these  
preparations by the Q Exactive HF were confirmed by the qualitative orthogonal method (Synapt  
200 G2 ion mobility/PLGS analysis). The reference proteome UP000000653 for *Pseudomonas*  
*aeruginosa* strain PA14 from UniProt (Release 2015\_10, 11/10/2015) was used for all database  
searches. All raw MS data files will be publicly available at the MassIVE data repository  
(<https://massive.ucsd.edu>).

205 **Scanning-electron microscopy.** The SDS-insoluble pellet was resuspended in pre-fixative  
solution (2% paraformaldehyde, 2.5% glutaraldehyde, 0.0075% L-lysine in PBS), nutated at RT  
for 30 min in the dark, washed in PBS, and fixed in 2.5% glutaraldehyde in PBS at RT for 30  
min in the dark. Fixed pellets were washed twice in PBS, dehydrated through a series of 60-min  
ethanol washes (25%, 50%, 75%, 95%, 3 x 100%) and visualized with a Helios NanoLab  
210 DualBeam 660 (FEI).

**Fluorescence visualization in *P. aeruginosa* colony biofilms.** For whole-colony fluorescence  
imaging, colony biofilms were grown as described for morphology assays but on growth medium  
without dyes. After three days, bright field images and fluorescence images were visualized with  
215 a Zeiss Axio Zoom.V16 fluorescence stereo zoom microscope. Thin sections of colony biofilms  
( $n \geq 3$  biological replicates) were prepared as described previously <sup>14</sup>. Differential interference  
contrast (DIC) and fluorescent confocal images were captured using an LSM800 confocal  
microscope (Zeiss).

220 **A. *thaliana* colonization assays.** *Arabidopsis thaliana* ecotype Columbia (Col-0) seeds were  
sterilized using standard bleach protocols<sup>26</sup>. Washed, surface-sterilized seeds were  
resuspended in 0.1% agar and subjected to 24 h of cold treatment at 4°C, then plated and  
germinated on half-strength MS agar medium containing Gamborg vitamins<sup>27</sup>. Seeds were  
incubated at 22°C with a 12-h-light/12-h-dark photoperiod (100-150  $\mu\text{E}/\text{m}^2/\text{s}$ ; Percival CU-22L)  
225 for three weeks. *A. thaliana* seedlings were then inoculated with PA14 using a flood inoculation  
assay<sup>28</sup> and incubated under the same light/dark conditions for five days. For visualization of  
PA14-infected *A. thaliana*, leaves were excised and *mScarlet* fluorescence was visualized with  
a Zeiss Axio Zoom.V16 fluorescence stereo zoom microscope. For quantification of PA14  
colonization of *A. thaliana*, seedlings were harvested, weighed, and surface-sterilized with 1 mL  
230 of 5%  $\text{H}_2\text{O}_2$  in water for 3 min. These seedlings were washed five times with sterile PBS and  
homogenized in 1 mL of PBS in a bead mill homogenizer on the “high” setting for 99 sec. Serial  
dilutions of homogenized tissue were plated onto LB agar plates containing 4  $\mu\text{g}/\text{ml}$  tetracycline  
and grown overnight at 37°C to select for *P. aeruginosa*, and CFU counts were quantified.

235 **C. *elegans* pathogenicity assays.** Ten  $\mu\text{L}$  of overnight PA14 cultures were spotted onto NGM  
agar plates<sup>29</sup> and incubated at 24 h at 37°C, followed by 48 h at 25°C. Thirty to 35 larval stage 4  
(L4) worms were picked onto the PA14-seeded plates and incubated at 25°C. For visualization of  
PA14-infected worms, worms were exposed to PA14 for three days, immobilized in 10 mM  
levamisole in water, mounted on a 2% agarose pad on a glass slide, and imaged at 40x on a  
240 Zeiss Axio Imager D1 epifluorescence microscope with an AxioCam Mrm. For pathogenicity killing  
assays, which were modified from Tan 1999, live/dead worms were counted for up to four days  
after plating onto PA14-seeded plates. *unc-44(e362)* worms, which exhibit body movement  
deficits, were used instead of wild-type to prevent worms from crawling off the plates.

245 **Phylogenetic analysis.** Trees in Supplementary Figures 1 and 2 were generated with Geneious Prime 2020.2.4 using Muscle for sequence alignment and the neighbor-joining method for tree building (genetic distance model: Jukes-Cantor).

## 250 **ACKNOWLEDGEMENTS**

This study was supported by NIH/NIAID grant R01AI103369, an NSF CAREER award to L.E.P.D., and NSF GRFP grant DGE - 1644869 to B.W. Mass spectrometer acquisition and operations were funded by New York State Stem Cell Science Board (NYSTEM contracts CO2361 and C029159) with matching funds from Columbia University and the Columbia Stem Cell Initiative (LMB). We thank Jason Reed (UNC Chapel Hill) for providing *A. thaliana* Col-0 seeds, Hillary Callahan (Barnard College) for technical support in growing seedlings, Martin Chalfie for provision of *C. elegans unc-44(e362)*, and Iva Greenwald for technical support with imaging of *C. elegans*. We also thank Zarina Akbary for technical assistance in creating the  $\Delta rebZ \Delta fec12 P_{rebP1}\text{-}gfp$  strain.

260

## REFERENCES

1. Quackenbush, R. L. & Burbach, J. A. Cloning and expression of DNA sequences associated with the killer trait of *Paramecium tetraurelia* stock 47. *Proc. Natl. Acad. Sci. U. S. A.* **80**, 250–254 (1983).  
265
2. Gibson, I. A comparison of the refractile bodies (R-bodies) of certain bacteria—III. Nucleotide sequence homologies and R-body function. *Micron and Microscopica Acta* **15**, 253–259 (1984).
3. Gibson, I., Bedingfield, G., Dobbs, H. & Shackleton, J. Effects of various agents on the R  
270 bodies of certain bacteria. *Micron and Microscopica Acta* **18**, 71–75 (1987).
4. Pond, F. R., Gibson, I., Lalucat, J. & Quackenbush, R. L. R-body-producing bacteria. *Microbiol. Rev.* **53**, 25–67 (1989).
5. Jurand, A., Preer, J. R. & Rudman, B. M. Further investigations on the prelethal effects of the killing action of kappa containing killer stocks of *Paramecium aurelia*. *J. Exp. Zool.* **206**,  
275 25–47 (1978).
6. Sonneborn, T. M. Mating Types in *Paramecium Aurelia*: Diverse Conditions for Mating in Different Stocks; Occurrence, Number and Interrelations of the Types. *Proc. Am. Philos. Soc.* **79**, 411–434 (1938).
7. Raymann, K., Bobay, L.-M., Doak, T. G., Lynch, M. & Gribaldo, S. A genomic survey of Reb  
280 homologs suggests widespread occurrence of R-bodies in proteobacteria. *G3* **3**, 505–516 (2013).
8. Winsor, G. L. *et al.* Enhanced annotations and features for comparing thousands of *Pseudomonas* genomes in the *Pseudomonas* genome database. *Nucleic Acids Res.* **44**, D646-53 (2016).
- 285 9. Feinbaum, R. L. *et al.* Genome-wide identification of *Pseudomonas aeruginosa* virulence-related genes using a *Caenorhabditis elegans* infection model. *PLoS Pathog.* **8**, e1002813

- (2012).
10. Schulz, S. *et al.* Elucidation of sigma factor-associated networks in *Pseudomonas aeruginosa* reveals a modular architecture with limited and function-specific crosstalk. *PLoS Pathog.* **11**, e1004744 (2015).  
290
  11. Polka, J. K. & Silver, P. A. A Tunable Protein Piston That Breaks Membranes to Release Encapsulated Cargo. *ACS Synth. Biol.* **5**, 303–311 (2016).
  12. Heruth, D. P., Pond, F. R., Dilts, t. J. A. & Quackenbush, R. L. Characterization of Genetic Determinants for R Body Synthesis and Assembly in *Caedibacter taeniospiralis* 47 and 116.  
295 *J. Bacteriol.* **176**, 3559–3567 (1994).
  13. Stewart, P. S. & Franklin, M. J. Physiological heterogeneity in biofilms. *Nat. Rev. Microbiol.* **6**, 199–210 (2008).
  14. Cornell, W. C. *et al.* Paraffin Embedding and Thin Sectioning of Microbial Colony Biofilms for Microscopic Analysis. *J. Vis. Exp.* (2018) doi:10.3791/57196.
  - 300 15. Tan, M. W., Mahajan-Miklos, S. & Ausubel, F. M. Killing of *Caenorhabditis elegans* by *Pseudomonas aeruginosa* used to model mammalian bacterial pathogenesis. *Proc. Natl. Acad. Sci. U. S. A.* **96**, 715–720 (1999).
  16. Walker, T. S. *et al.* *Pseudomonas aeruginosa*-plant root interactions. Pathogenicity, biofilm formation, and root exudation. *Plant Physiol.* **134**, 320–331 (2004).
  - 305 17. Preer, J. R., Jr, Preer, L. B. & Jurand, A. Kappa and other endosymbionts in *Paramecium aurelia*. *Bacteriol. Rev.* **38**, 113–163 (1974).
  18. Matsuoka, J.-I. *et al.* A putative TetR-type transcription factor AZC\_3265 from the legume symbiont *Azorhizobium caulinodans* represses the production of R-bodies that are toxic to eukaryotic cells. *Soil Sci. Plant Nutr.* **63**, 452–459 (2017).
  - 310 19. Flemming, H.-C. *et al.* Biofilms: an emergent form of bacterial life. *Nat. Rev. Microbiol.* **14**, 563–575 (2016).
  20. Donlan, R. M. Biofilms: microbial life on surfaces. *Emerg. Infect. Dis.* **8**, 881–890 (2002).

21. Okegbe, C. *et al.* Electron-shuttling antibiotics structure bacterial communities by modulating cellular levels of c-di-GMP. *Proc. Natl. Acad. Sci. U. S. A.* **114**, E5236–E5245 (2017).  
315
22. Shanks, R. M. Q., Caiazza, N. C., Hinsa, S. M., Toutain, C. M. & O’Toole, G. A. *Saccharomyces cerevisiae*-based molecular tool kit for manipulation of genes from gram-negative bacteria. *Appl. Environ. Microbiol.* **72**, 5027–5036 (2006).
23. Oswald, E. S., Brown, L. M., Bulinski, J. C. & Hung, C. T. Label-free protein profiling of adipose-derived human stem cells under hyperosmotic treatment. *J. Proteome Res.* **10**, 3050–3059 (2011).  
320
24. Yang, W. S. *et al.* Regulation of ferroptotic cancer cell death by GPX4. *Cell* **156**, 317–331 (2014).
25. Wobma, H. M. *et al.* The influence of hypoxia and IFN- $\gamma$  on the proteome and metabolome of therapeutic mesenchymal stem cells. *Biomaterials* **167**, 226–234 (2018).  
325
26. Clough, S. J. & Bent, A. F. Floral dip: a simplified method for *Agrobacterium*-mediated transformation of *Arabidopsis thaliana*. *The Plant Journal* vol. 16 735–743 (1998).
27. Murashige, T. & Skoog, F. A Revised Medium for Rapid Growth and Bio Assays with Tobacco Tissue Cultures. *Physiologia Plantarum* vol. 15 473–497 (1962).
28. Ishiga, Y., Ishiga, T., Uppalapati, S. R. & Mysore, K. S. *Arabidopsis* seedling flood-inoculation technique: a rapid and reliable assay for studying plant-bacterial interactions. *Plant Methods* **7**, 32 (2011).  
330
29. Brenner, S. The genetics of *Caenorhabditis elegans*. *Genetics* **77**, 71–94 (1974).
30. Rahme, L. G. *et al.* Use of model plant hosts to identify *Pseudomonas aeruginosa* virulence factors. *Proc. Natl. Acad. Sci. U. S. A.* **94**, 13245–13250 (1997).  
335

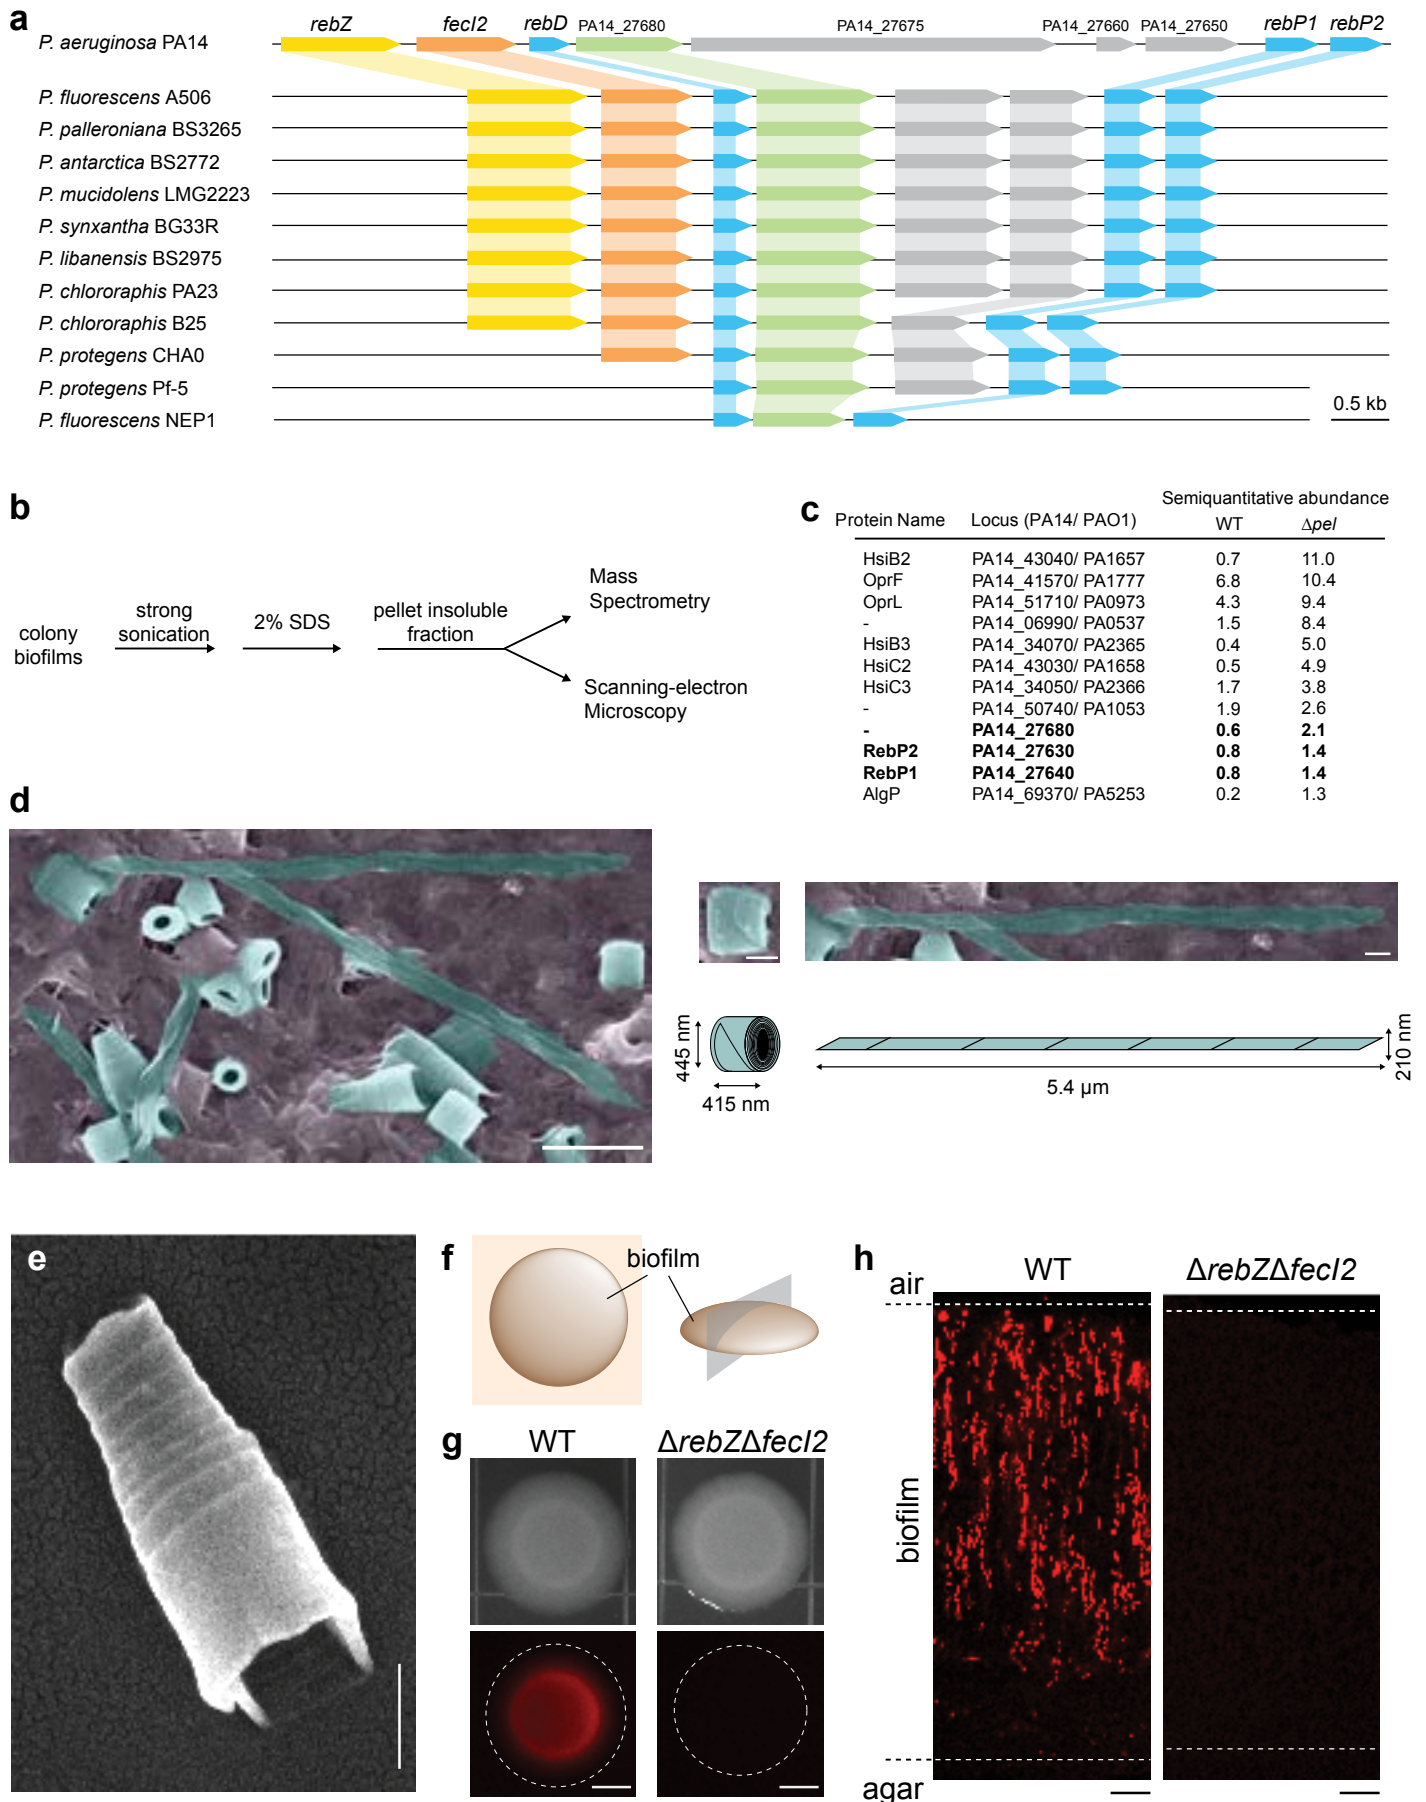



**Fig.1. Components of the *reb* gene cluster, which are found in diverse pseudomonads, support R-body production by *Pseudomonas aeruginosa* PA14 biofilms. **a**, Chromosomal arrangement of genes associated with R-body production in representative *Pseudomonas* species and strains. Regulatory genes are shaded yellow and orange. Genes shaded blue are homologous to the R-body structural genes from *C. taeniospiralis*. *PA14\_27680* and its homologues, which may code for a novel R-body component, are shaded green. **b**, Schematic showing method for preparation of SDS-insoluble material from PA14 biofilms. **c**, Top 12 most abundant proteins (semi-quantitative) detected in the SDS-insoluble formic acid solubilized fraction of WT (one replicate) and  $\Delta pel$  (two biological replicates) by mass spectrometry. **d**, Left panel: Scanning-electron micrograph (SEM) image of R-bodies (false-colored turquoise) in the insoluble fraction. Scale bar = 1  $\mu\text{m}$ . Right: SEM images, cartoon representations, and dimensions of individual selected R-bodies in fully coiled and fully extended states. Scale bars = 250 nm. **e**, SEM image of a single, partially extended R-body. Scale bar = 400 nm. **f**, Schematic indicating planes of view for panels **g** and **h**. **g**, Bright-field and fluorescence microscopy images of three-day-old biofilms formed by the indicated genotypes, containing the  $P_{rebP1}$ -*mScarlet* construct. Dotted lines demarcate the edge of the biofilm. Scale bar = 25 mm. **h**, Representative images of thin sections prepared from three-day-old biofilms formed by the indicated genotypes, containing the  $P_{rebP1}$ -*mScarlet* construct. Dotted lines denote the interfaces with air (top) and agar (bottom). Scale bar = 10  $\mu\text{m}$ .**



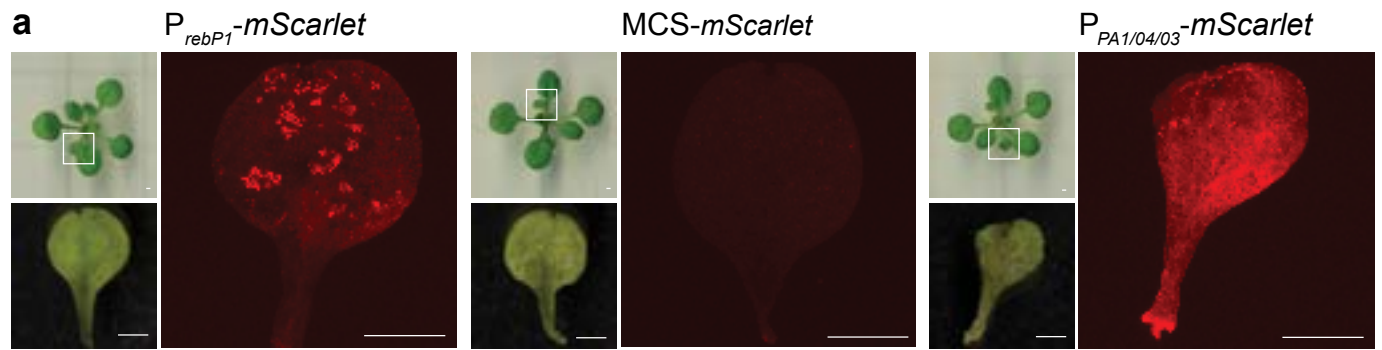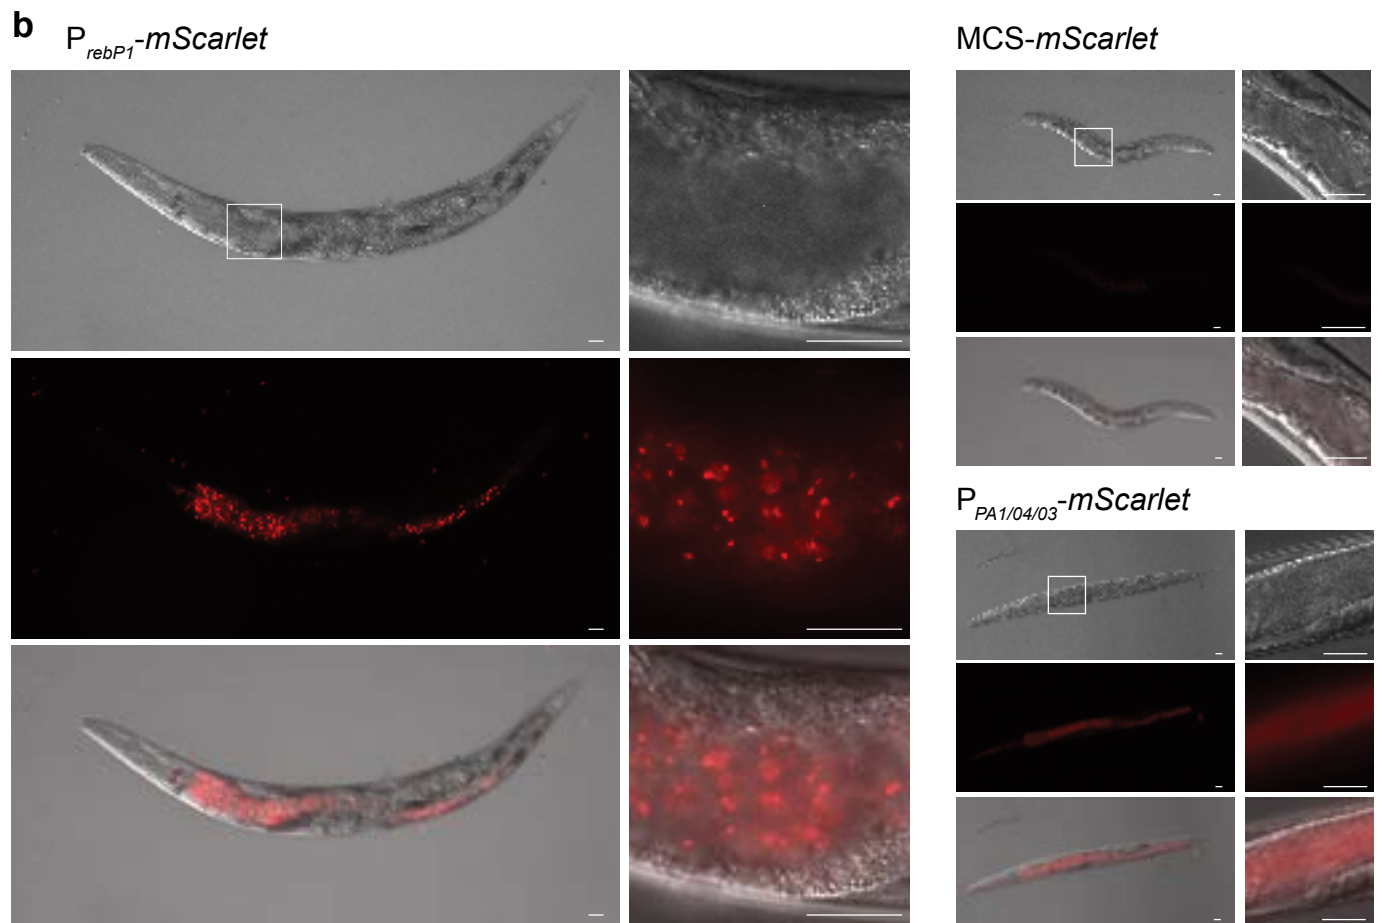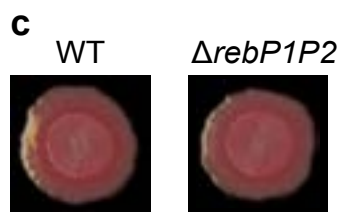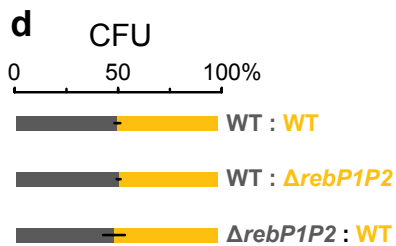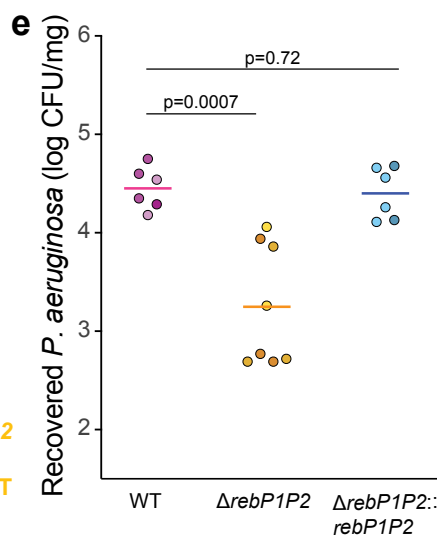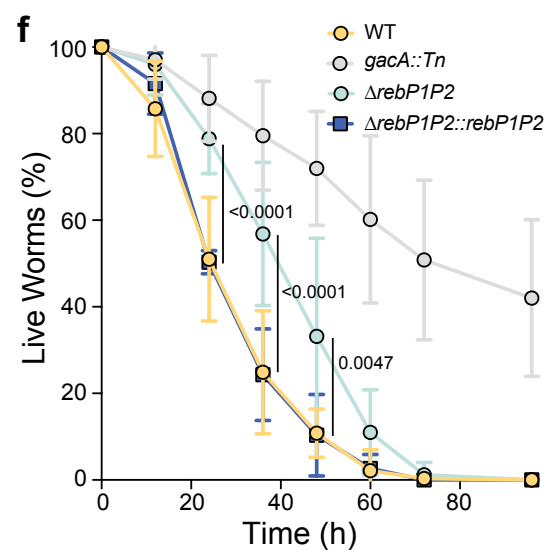

**Fig. 2. *rebP1P2* is expressed during host association and contributes to host colonization and killing, but does not confer an advantage during host-independent growth.**

**a**, Fluorescent micrographs of *A. thaliana* leaves infected with WT PA14 expressing mScarlet under the control of the *rebP1* promoter ( $P_{rebP1}$ -mScarlet), no promoter (MCS-mScarlet), or a constitutive promoter ( $P_{PA1/04/03}$ -mScarlet). Smaller panels show images of the whole seedling and the imaged leaf indicated by the white box. Images are representative of nine biological replicates from three experiments. Scale bars = 1 mm. **b**, Images of *C. elegans* fed WT PA14 containing the indicated reporter constructs. Top panels, Nomarski; middle panels, fluorescence; bottom panels, overlay. White boxes indicate regions shown in close-up images. Images are representative of 15 replicates from three experiments. Scale bars = 10  $\mu$ m. **c**, Three-day-old WT and  $\Delta rebP1P2$  biofilms grown on colony morphology medium. Images are representative of nine replicates from three experiments. Scale bar = 4 mm. **d**, Representation of each strain in colony forming units (CFUs) obtained from mixed-strain colony biofilms grown for three days. Error bars represent standard deviation of biological triplicates. **e**, CFUs obtained from *A. thaliana* seedlings inoculated with the indicated genotypes and incubated for five days, normalized to seedling weight. Each circle represents a biological replicate, with color intensity indicating replicates from the same experiment; colored lines indicate means. p-values were calculated using unpaired, two-tailed t-tests. **f**, Killing kinetics of *C. elegans* following exposure to various PA14 genotypes. The role of *gacA* in *C. elegans* pathogenicity has been described previously<sup>30</sup> and *gacA::Tn* therefore serves as a control for defective killing in this assay. Error bars denote standard deviation and p-values were calculated using unpaired, two-tailed t-tests.  $n \geq 4$  biological replicates from three experiments.
